# Supplementary material
Source: Research Square preprint supplement (doi:10.21203/rs.3.rs-10275015/v1)
Supplement: Supplementary file 1 [file 172abc81c333c47214351620.docx]

**Supplementary Files**

**NIMHANS Neuropsychology battery for the elderly: selected subtest details**

| **Domain** | **NNBE Subtests** |
| --- | --- |
| Attention | Digit span forward (verbal), spatial span forward (visuospatial) |
| Working memory | Digit span backward (verbal), Corsi block-tapping backward (visuospatial) |
| Verbal fluency | Categorical (vegetables/fruits, Animals), Phonemic fluency-word starts with P. |
| Learning and Verbal Memory | 10-word list with three learning trials, and a 20-minute delayed recall. |
| Visuospatial construction and memory | Stick construction with immediate and 20-minute delayed recall |
