# Supplementary material
Source: Research Square preprint supplement (doi:10.21203/rs.3.rs-10275015/v1)
Supplement: Supplementary file 2 [file 9ba346ec683b94adad009c4e.docx]

## Table 1. Demographics and clinical characteristics

| **Variable** | **PSP (n=98)** | **MSA (n=61)** | **p value** |
| --- | --- | --- | --- |
| Age (years) | 62.5 ± 7.4 | 58.6 ± 7.8 | **0.002** |
| Age of onset (years) | 59.9 ± 7.9 | 55.8 ± 7.9 | **0.002** |
| Sex (M: F) | 71:27 | 41:20 | 0.482 |
| Duration of Illness | 24 (12, 48) | 24 (12,37.25) | 0.611 |
| Years of education | 10 (6.25, 15) | 10 (7, 15) | 0.614 |
| No. of Languages known | 2 (1, 3) | 2 (1, 3) | 0.683 |
| Family history of PD (%) | 7 (7.14) | 2 (3.28) | 0.483 |
| Consanguinity in family (%) | 6 (6.12) | 7 (11.48) | 0.248 |
| Hypertension (%) | 50.0 | 29.5 | **0.013** |
| Diabetic (%) | 29.5 | 24.5 | 0.585 |
| Alcohol drinking (%) | 22 (22.49) | 7 (15.22) | 0.133 |
| Smoking (%) | 18 (18.37) | 6 (9.84) | 0.247 |
| UPDRS Part-III | 34 (22, 49) | 29 (18, 46) | 0.265 |
| PSPRS | 32 (25, 46) | NA | NA |
| UMSARS-I | NA | 16 (10, 20) | NA |
| UMSARS-II | NA | 17 (11.5,24) | NA |
| HAM-A | 11.3±5.8 | 11.5±5.5 | 0.828 |
| HAM-D | 12 (9, 15.5) | 13.5 (10, 17) | 0.137 |
| NPI Total | 5 (2, 9) | 4 (1, 7) | 0.335 |

## Independent sample t-test, values are given in mean±SD; Mann-Whitney U test, values are given in median (Q1, Q3); Chi-square test (categorical).

## Hamilton Anxiety Rating Scale (HAM-A), Hamilton Depression Rating Scale (HAM-D), Neuropsychiatric Inventory (NPI), PSP rating scale (PSPRS), Unified MSA rating scale Part I and II (UMSARS-I & II), Unified Parkinson’s Disease Rating Scale part-III (UPDRS-III)

## Table 2. Cognitive and Behavioral comparison - PSP vs MSA (age-adjusted, FDR-corrected)

| **Cognitive Measure** | **PSP (n = 98)** | **MSA (n = 61)** | **p (FDR)** |
| --- | --- | --- | --- |
| *Global Cognitive Screening* | | | |
| MoCA Total | 17.0 (11.8–22.2) | 21.0 (15.0–24.0) | **0.047** |
| FAB Total | 9.3 ± 3.7 | 11.3 ± 4.3 | **0.040** |
| ACE-III Total | 68.5 (54.0–82.0) | 77.0 (62.0–87.0) | **0.049** |
| *ACE-III Sub-domains* | | | |
| ACE-III Attention | 13.0 (10.0–17.0) | 15.0 (13.0–18.0) | **0.049** |
| ACE-III Memory | 18.0 (13.0–23.0) | 20.0 (15.0–24.0) | 0.114 |
| ACE-III Fluency | 6.0 ± 2.7 | 7.7 ± 2.4 | **0.003** |
| ACE-III Language | 22.0 (19.0–23.0) | 23.0 (20.0–25.0) | 0.278 |
| ACE-III Visuospatial | 10.0 (7.0–13.0) | 13.0 (8.0–15.0) | 0.092 |
| *Attention & Working Memory (NNBE)* | | | |
| Digit Span Forward | 4.0 (2.0–5.0) | 4.0 (3.0–5.0) | **0.049** |
| Digit Span Backward | 2.0 (2.0–4.0) | 3.0 (2.0–5.0) | 0.102 |
| Corsi Block Forward | 3.0 (1.0–5.0) | 5.0 (3.2–6.0) | **0.002** |
| Corsi Block Backward | 3.0 (2.0–4.0) | 4.0 (3.0–5.0) | **0.008** |
| *Verbal Learning & Memory (NNBE)* | | | |
| Word List Trial 1 | 3.0 (2.0–4.0) | 4.0 (2.0–4.0) | 0.077 |
| Word List Trial 3 | 5.0 (4.0–7.0) | 6.0 (5.0–8.0) | 0.065 |
| Word List Delayed Recall | 4.0 (2.0–5.0) | 4.0 (3.0–6.0) | 0.126 |
| Recognition | 9.0 (7.0–10.0) | 9.0 (7.0–9.0) | 0.784 |
| *Fluency* | | | |
| Fruits Fluency | 7.5 ± 3.7 | 9.2 ± 3.0 | 0.054 |
| Vegetable Fluency | 7.9 ± 4.0 | 10.1 ± 3.9 | **0.035** |
| Animal Fluency | 8.3 ± 3.7 | 10.5 ± 4.6 | **0.024** |
| Phonemic Fluency (COWA-P) | 3.3 ± 3.1 | 5.0 ± 3.3 | **0.019** |
| *Visuospatial Construction & Memory (NNBE)* | | | |
| Stick Construction Total | 24.0 (17.0–24.0) | 24.0 (22.2–24.0) | **0.046** |
| Stick Construction IR | 21.0 (14.0–24.0) | 23.0 (20.0–24.0) | 0.055 |
| Stick Construction DR | 8.0 (5.2–13.0) | 13.0 (5.2–15.0) | 0.120 |

*Values are medians (Mann-Whitney U test) or means (t-test for FAB/fluency measures), adjusted for age via ANCOVA. p-values FDR-corrected (Benjamini-Hochberg) across 29 comparisons. "Yes" = corrected p<0.05.*

Addenbrooke's Cognitive Examination-III (ACE-III), Frontal Assessment Battery (FAB), Montreal Cognitive Assessment (MoCA)
